# Supplementary material for: Quantitative Comparison of Catalytic Mechanisms and Overall Reactions in Convergently Evolved Enzymes: Implications for Classification of Enzyme Function
Source: PubMed Central journal article supplement (PMC2837397; doi:10.1371/journal.pcbi.1000700), 2010-03-12
Supplement: pcbi.1000700.s001.pdf [file pcbi.1000700.s001.pdf]

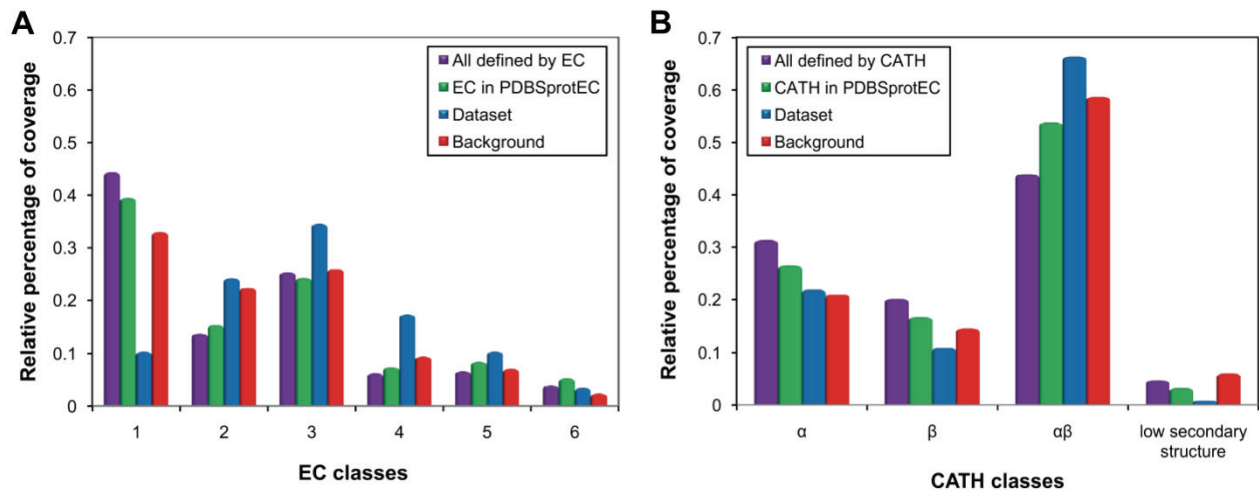

**Figure S1. Coverage of the dataset of functional analogs and of the background dataset.** (A) Distribution of sub-subclasses per EC class. (B) Distribution of superfamilies per CATH class.
